# Supplementary material for: Electron scale coherent structure as micro accelerator in the Earth’s magnetosheath
Source: PubMed Central journal article supplement (PMC10824732; doi:10.1038/s41467-024-45040-5), 2024-01-30
Supplement: 41467_2024_45040_MOESM1_ESM.pdf [file 41467_2024_45040_MOESM1_ESM.pdf]

1  
2  
3  
4  
5  
6  
7  
8  
9  
10  
11  
12  
13  
14  
15  
16  
17  
18  
19  
20  
21  
22  
23  
24

## Supplementary Information for

# Electron Scale Coherent Structure as Micro Accelerator in the Earth's Magnetosheath

Zi-Kang Xie<sup>1</sup>, Qiu-Gang Zong<sup>1,2\*</sup>, Chao Yue<sup>1</sup>, Xu-Zhi Zhou<sup>1</sup>, Zhi-Yang Liu<sup>1</sup>, Jian-Sen He<sup>1</sup>, Yi-Xin Hao<sup>3</sup>, Chung-Sang Ng<sup>4</sup>, Hui Zhang<sup>5</sup>, Shu-Tao Yao<sup>5</sup>, Craig Pollock<sup>6</sup>, Guan Le<sup>7</sup>, Robert Ergun<sup>8</sup>, Per-Arne Lindqvist<sup>9</sup>

<sup>1</sup>Institute of Space Physics and Applied Technology, Peking University, Beijing 100871, China. <sup>2</sup>State Key Laboratory of Lunar and Planetary Sciences, Macau University of Science and Technology, Taipa, Macau, China. <sup>3</sup>Max Planck Institute for Solar System Research, Göttingen, Germany. <sup>4</sup>Geophysical Institute, University of Alaska Fairbanks, Fairbanks, AK, USA. <sup>5</sup>Shandong Provincial Key Laboratory of Optical Astronomy and Solar-Terrestrial Environment, Institute of Space Sciences, Shandong University, Weihai 264209, China. <sup>6</sup>Denali Scientific, 3771 Mariposa Lane, Fairbanks, AK 99709, USA. <sup>7</sup>Heliophysics Science Division, NASA, Goddard Space Flight Center, Greenbelt, MD 20771, USA. <sup>8</sup>Department of Astrophysical and Planetary Sciences, University of Colorado LASP, Boulder, CO, USA. <sup>9</sup>Department of Space and Plasma Physics, KTH Royal Institute of Technology, Stockholm, Sweden.

\*Correspondence to: [qgzong@pku.edu.cn](mailto:qgzong@pku.edu.cn)

### **This PDF file includes:**

Supplementary Figures 1 to 4

Supplementary Table 1

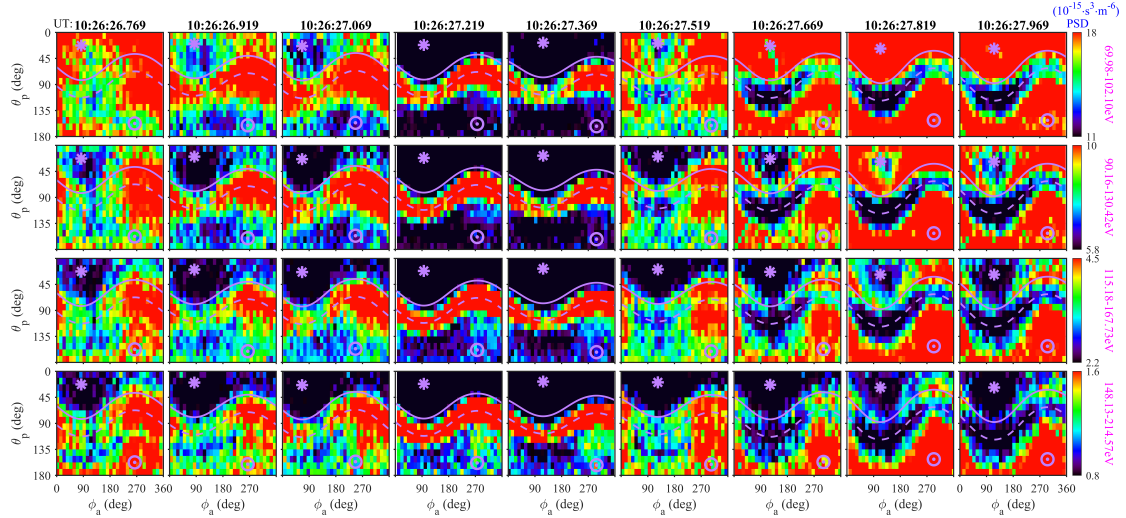

25

26 **Supplementary Figure 1. Sky-maps for electron phase space densities inside the**  
 27 **structure.** Each column shows observations at different times, which are labeled on the  
 28 top. Panels in the same row are from the same energy channel, and the energy range is  
 29 labeled on the right. For each panel the horizontal and the vertical axes are azimuthal  
 30 and polar angles in DBCS (De-spun Body Coordinate System), respectively. The  
 31 asterisk and the circle represent parallel and anti-parallel directions to the magnetic field,  
 32 respectively. In each panel, the dashed line represents  $90^\circ$  pitch angle in the sky-map,  
 33 while the solid line is for  $60^\circ$  pitch angle.

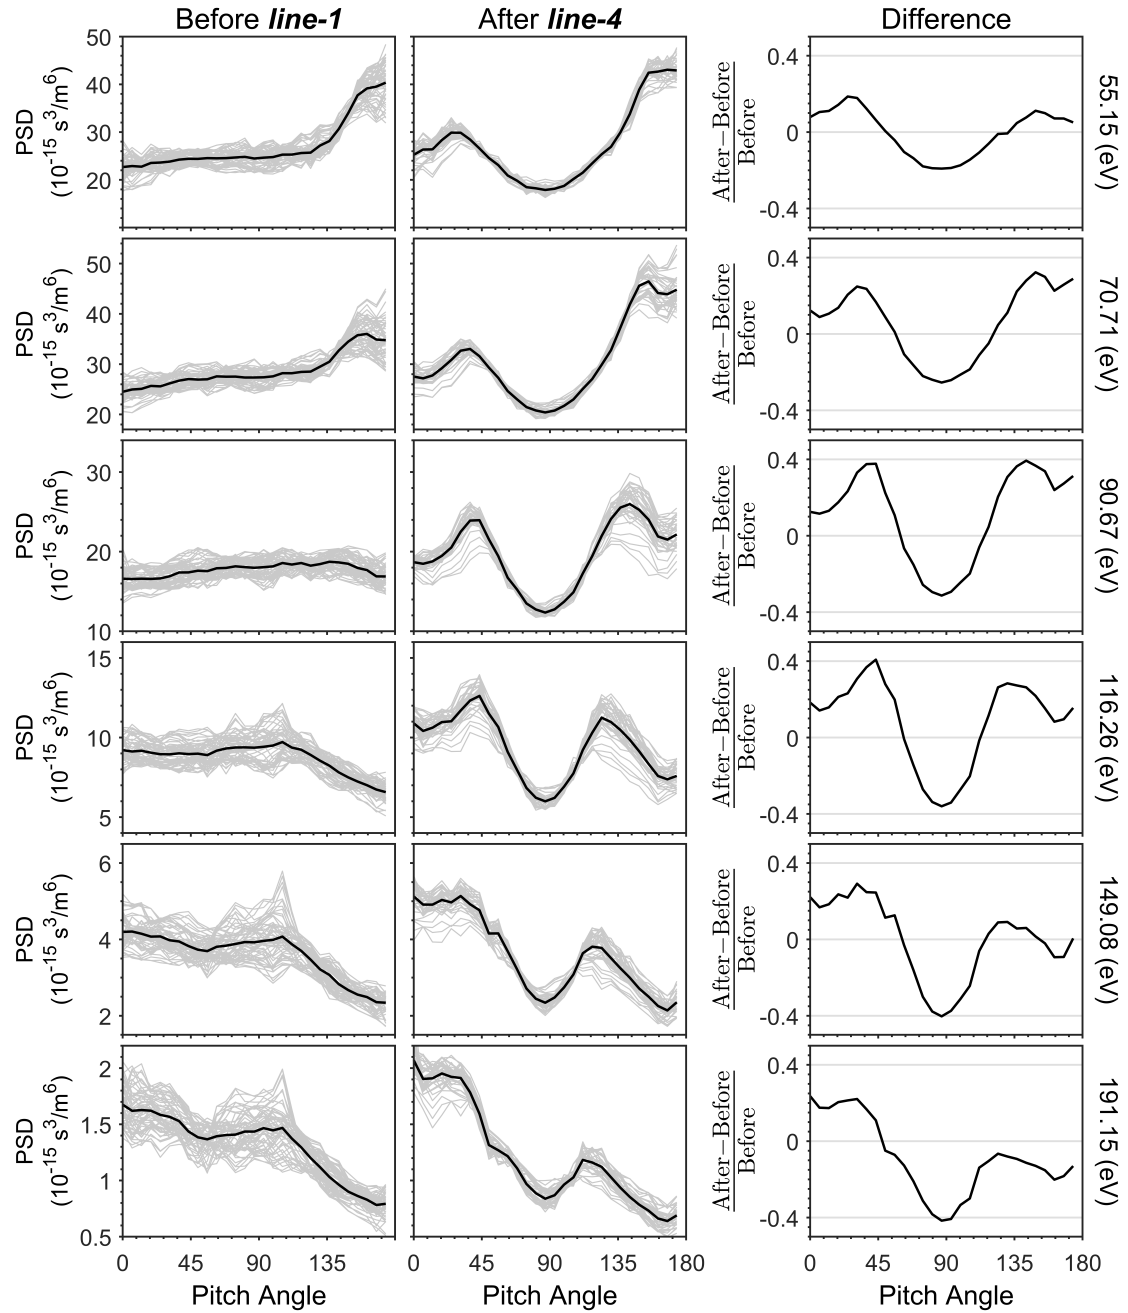

34

35 **Supplementary Figure 2. Electron pitch angle distributions before line-1 and after**  
 36 **line-4.** From left to right, the first and second columns are the electron phase space  
 37 density (PSD) before line-1 and after line-4, respectively (line-1 and line-4 are detailed  
 38 in Figure 1 of the main text). The third column is the difference of the PSD relative to  
 39 its value before line-1. Panels in the same row are from the same energy channel, and  
 40 the energy is labeled on the right.

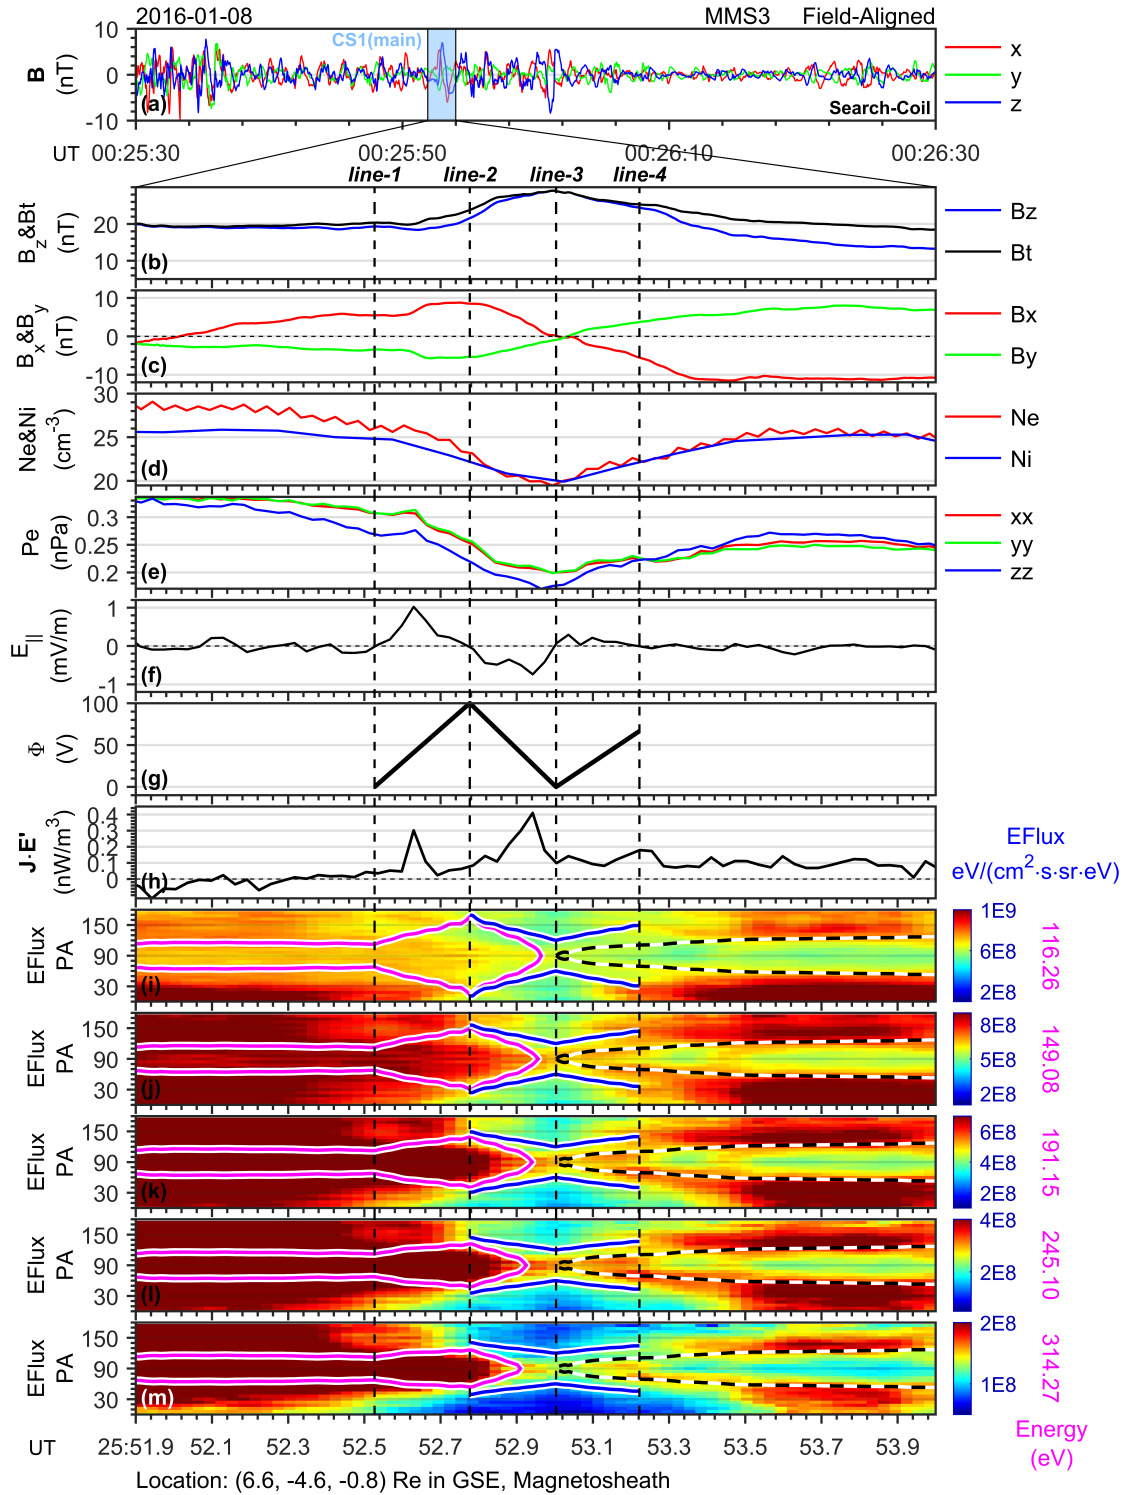

41

42 **Supplementary Figure 3. Another coherent structure found in the turbulent**  
 43 **magnetosheath.** Panel (a) shows the turbulent magnetic fields at a 1-minute time scale,  
 44 while the rest panels (b) – (m) are for only 2.1 seconds (CS1). Panels (b) and (c) show  
 45 magnetic field components ( $B_x$  in red,  $B_y$  in green,  $B_z$  in blue, and the field strength



46  $B_t$  in black) in the local field-aligned coordinates. Panels **(d)**, **(e)**, and **(f)** denote  
 47 electron and ion number density, diagonal terms of electron pressure tensor, and parallel  
 48 electric field ( $E_{\parallel}$ ), respectively. Panel **(g)** shows the assumed electric potential. Panel  
 49 **(h)** shows the  $\mathbf{J} \cdot \mathbf{E}'$ . Panels **(i)** - **(m)** show pitch angle distributions of electron energy  
 50 flux of energies from  $\sim 116$  eV to  $\sim 314$  eV. There are four vertical dashed lines across  
 51 all panels, where line-1 represents the begin of non-zero  $E_{\parallel}$ ; line-2 and line-3 mark out  
 52 the time when the sign of  $E_{\parallel}$  is reversed; line-4 is the end of non-zero  $E_{\parallel}$ . In panels **(i)**  
 53 - **(m)**, the magenta lines represent the critical trapping angle  $\alpha_t$  defined by Equation  
 54 (6); the blue lines show the expected streaming region given an electron source at line-  
 55 3 ( $60^\circ$  to  $120^\circ$  pitch angle); the dashed black (white) lines reproduce single particle  
 56 motion for an electron starting at line-3 ( $90^\circ$  pitch angle) without the impact of  $E_{\parallel}$ . All  
 57 the lines (magenta, blue, and dashed) are directly deduced by electromagnetic field  
 58 observations (panels **(b)**, **(c)**, **(f)**, and **(g)**). Spacecraft position is labeled at the bottom  
 59 of the figure.

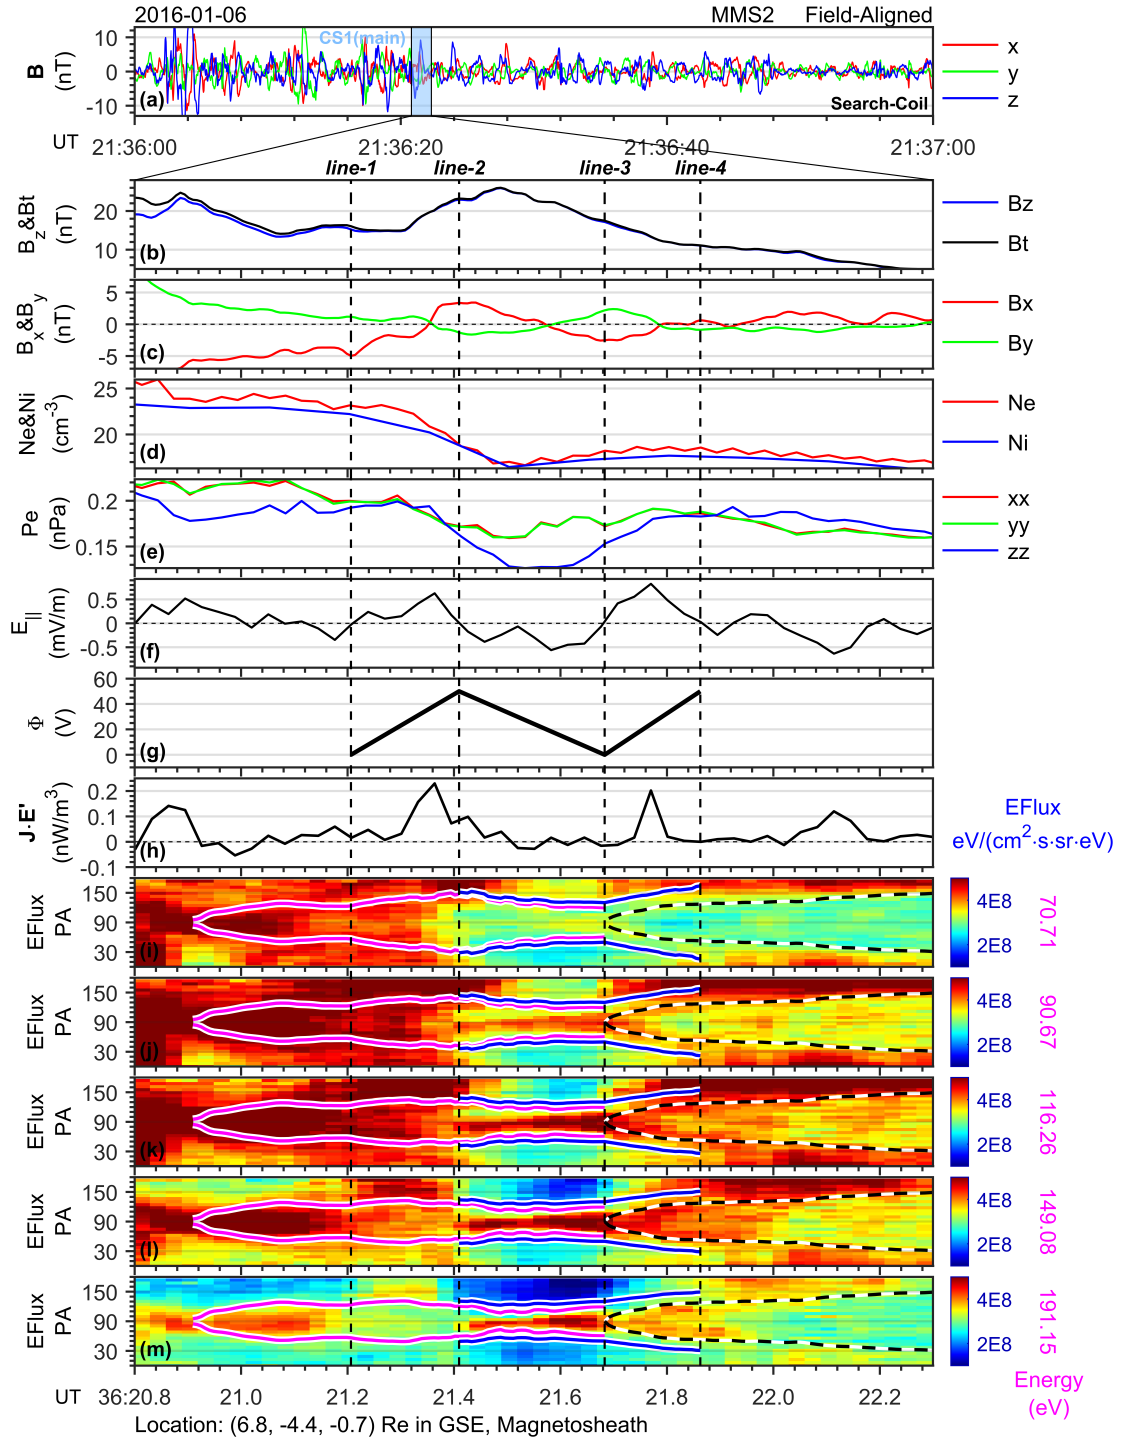

60

61 **Supplementary Figure 4. Another coherent structure found in the turbulent**  
 62 **magnetosheath.** Panel (a) shows the turbulent magnetic fields at a 1-minute time scale,  
 63 while the rest panels (b) – (m) are for only 1.5 seconds (CS1). Panels (b) and (c) show  
 64 magnetic field components ( $B_x$  in red,  $B_y$  in green,  $B_z$  in blue, and the field strength

65  $B_t$  in black) in the local field-aligned coordinates. Panels (d), (e), and (f) denote  
66 electron and ion number density, diagonal terms of electron pressure tensor, and parallel  
67 electric field ( $E_{\parallel}$ ), respectively. Panel (g) shows the assumed electric potential. Panel  
68 (h) shows the  $\mathbf{J} \cdot \mathbf{E}'$ . Panels (i) - (m) show pitch angle distributions of electron energy  
69 flux of energies from  $\sim 70$  eV to  $\sim 191$  eV. There are four vertical dashed lines across all  
70 panels, where line-1 represents the begin of non-zero  $E_{\parallel}$ ; line-2 and line-3 mark out the  
71 time when the sign of  $E_{\parallel}$  is reversed; line-4 is the end of non-zero  $E_{\parallel}$ . In panels (i) -  
72 (m), the magenta lines represent the critical trapping angle  $\alpha_t$  defined by Equation (6);  
73 the blue lines show the expected streaming region given an electron source at line-3  
74 ( $60^\circ$  to  $120^\circ$  pitch angle); the dashed black (white) lines reproduce single particle  
75 motion for an electron starting at line-3 ( $90^\circ$  pitch angle) without the impact of  $E_{\parallel}$ . All  
76 the lines (magenta, blue, and dashed) are directly deduced by electromagnetic field  
77 observations (panels (b), (c), (f), and (g)). Spacecraft position is labeled at the bottom  
78 of the figure.

79 **Supplementary Table 1. Start time of similar electron-scale structures, observed by**  
80 **MMS1.** 54 coherent structures have been found from September 1 to 7, 2015.

|                       |                       |                       |
|-----------------------|-----------------------|-----------------------|
| 2015-09-02T13:53:34UT | 2015-09-02T17:02:44UT | 2015-09-03T16:54:24UT |
| 2015-09-02T15:27:24UT | 2015-09-02T17:05:44UT | 2015-09-03T16:54:34UT |
| 2015-09-02T15:27:34UT | 2015-09-02T17:13:54UT | 2015-09-03T16:54:34UT |
| 2015-09-02T15:27:44UT | 2015-09-02T17:15:14UT | 2015-09-03T16:55:24UT |
| 2015-09-02T15:27:54UT | 2015-09-02T17:16:24UT | 2015-09-03T17:21:04UT |
| 2015-09-02T15:28:44UT | 2015-09-02T17:23:54UT | 2015-09-03T17:21:54UT |
| 2015-09-02T15:29:44UT | 2015-09-02T17:30:24UT | 2015-09-03T17:22:04UT |
| 2015-09-02T15:29:54UT | 2015-09-02T17:31:44UT | 2015-09-03T17:22:24UT |

|                       |                       |                       |
|-----------------------|-----------------------|-----------------------|
| 2015-09-02T16:07:34UT | 2015-09-03T14:24:24UT | 2015-09-03T17:23:04UT |
| 2015-09-02T16:11:04UT | 2015-09-03T14:24:44UT | 2015-09-03T17:23:14UT |
| 2015-09-02T16:12:04UT | 2015-09-03T14:31:04UT | 2015-09-07T13:32:44UT |
| 2015-09-02T16:13:24UT | 2015-09-03T15:15:04UT | 2015-09-07T13:33:24UT |
| 2015-09-02T16:47:44UT | 2015-09-03T16:14:44UT | 2015-09-07T13:36:44UT |
| 2015-09-02T16:56:14UT | 2015-09-03T16:50:04UT | 2015-09-07T13:38:24UT |
| 2015-09-02T16:56:34UT | 2015-09-03T16:52:54UT | 2015-09-07T13:57:14UT |
| 2015-09-02T17:00:34UT | 2015-09-03T16:53:14UT | 2015-09-07T13:58:44UT |
| 2015-09-02T17:02:14UT | 2015-09-03T16:54:04UT | 2015-09-07T13:59:04UT |
| 2015-09-02T17:02:24UT | 2015-09-03T16:54:14UT | 2015-09-07T13:59:54UT |
